# Supplementary material for: Performance of Node-RADS Scoring System for a Standardized Assessment of Regional Lymph Nodes in Bladder Cancer Patients
Source: MDPI journal article supplement (doi:10.3390/cancers15030580), 2023-01-18
Supplement: s1 [file s1]

**Supplementary Table S1.** Lymph-node invasion (LNI) rates at final pathologic examination according to preoperative Node-Rads score for all lymph node packets analyzed (lymph node level).

|          | <b>Overall</b> | <b>Node-RADS</b> |                |              |              |              | <b>p-val<sup>1</sup></b> |
|----------|----------------|------------------|----------------|--------------|--------------|--------------|--------------------------|
| LNI      | 392 (100%)     | 1, 208 (53.1%)   | 2, 134 (34.2%) | 3, 22 (5.6%) | 4, 12 (3.1%) | 5, 16 (4.1%) | <0.001                   |
| Negative | 358 (91.3%)    | 206 (99.0%)      | 130 (97.0%)    | 11 (50.0%)   | 7 (58.3%)    | 4 (25.0%)    |                          |
| Positive | 34 (8.7%)      | 2 (1.0%)         | 4 (3.0%)       | 11 (50.0%)   | 5 (41.7%)    | 12 (75.0%)   |                          |

**Supplementary Table S2.** Multivariable logistic regression models addressing lymph-node invasion in bladder cancer patients treated with radical cystectomy plus extended pelvic lymph-node dissection at both patient-level (**2A**) and lymph-node level (**2B**). Node-RADS was considered as a linear predictor or categorized according to clinically meaningful cut-offs (3 or 4). Harrel C-index was computed for all models.

| 2A<br>(Patient level)               | Model with Node-RADS<br>(Linear predictor) |         | Model with Node-RADS<br>(1-2 vs ≥ 3 vs) |         | Model with Node-RADS<br>(1-2 vs ≥ 4) |         | Model without Node-RADS |         |
|-------------------------------------|--------------------------------------------|---------|-----------------------------------------|---------|--------------------------------------|---------|-------------------------|---------|
|                                     | OR (95% CI)                                | p-value | OR (95% CI)                             | p-value | OR (95% CI)                          | p-value | OR (95% CI)             | p-value |
| <b>Node-RADS</b> ( <i>score</i> )   | 3.38 (1.68- 9.40)                          | 0.004   |                                         |         |                                      |         |                         |         |
| <b>Node-RADS</b>                    |                                            |         |                                         |         |                                      |         |                         |         |
| <i>1-2</i>                          |                                            |         | ref.                                    |         |                                      |         |                         |         |
| <i>≥ 3</i>                          |                                            |         | 9.50 (1.79-69.2)                        | 0.013   |                                      |         |                         |         |
| <b>Node-RADS</b>                    |                                            |         |                                         |         |                                      |         |                         |         |
| <i>1-3</i>                          |                                            |         |                                         |         | ref.                                 |         |                         |         |
| <i>≥ 4</i>                          |                                            |         |                                         |         | 16.88 (2.53-217.00)                  | 0.009   |                         |         |
| <b>Age</b> ( <i>years</i> )         | 0.92 (0.81-1.02)                           | 0.2     | 0.94 (0.85-1.03)                        | 0.2     | 0.91 (0.80-1.01)                     | 0.1     | 0.94 (0.86-1.02)        | 0.2     |
| <b>Clinical T stage</b>             |                                            |         |                                         |         |                                      |         |                         |         |
| <i>Organ-confined (cT≤2)</i>        | ref.                                       |         | ref.                                    |         | ref.                                 |         | ref.                    |         |
| <i>Non-organ confined (cT&gt;2)</i> | 30.16 (3.20-729.00)                        | 0.011   | 19.06 (2.82-251.72)                     | 0.008   | 44.35 (4.93-1148.65)                 | 0.004   | 19.86 (3.73-177.57)     | 0.002   |
| <b>Concomitant CIS</b>              |                                            |         |                                         |         |                                      |         |                         |         |
| <i>Absent</i>                       | ref.                                       |         | ref.                                    |         | ref.                                 |         | ref.                    |         |
| <i>Presence</i>                     | 33.00 (1.58-2695.59)                       | 0.058   | 12.90 (0.85-338.64)                     | 0.086   | 24.14 (1.88-838.49)                  | 0.032   | 13.69 (1.49-205.99)     | 0.032   |
| <b>C-index</b>                      | 0.94                                       |         | 0.91                                    |         | 0.92                                 |         | 0.86                    |         |

OR = odds ratio; CI = confidence interval. CIS = carcinoma in situ; NOC = Non-organ confined (cT>2); OC = Organ-confined (cT≤2)

[illegible]

**Supplementary Table S3.** Sensitivity, Specificity, Positive Predictive Value (PPV), Negative Predictive Value (NPV) and Accuracy were reported for different Node-Rads cut-offs.

| <b>NODE-<br/>RADS CUT-<br/>OFF</b> | <b>SPECIFICITY</b> | <b>SENSITIVITY</b> | <b>NPV</b> | <b>PPV</b> | <b>ACCURACY</b> |
|------------------------------------|--------------------|--------------------|------------|------------|-----------------|
| > 4                                | 98.9               | 35.3               | 94.1       | 75.0       | 93.4            |
| > 3                                | 96.9               | 50.0               | 95.3       | 60.7       | 92.9            |
| > 2                                | 93.9               | 82.4               | 98.2       | 56.0       | 92.9            |
| > 1                                | 57.5               | 94.1               | 99.0       | 17.4       | 60.7            |
